# Supplementary material
Source: publisher figshare collection journal article supplement (https://springernature.figshare.com/ndownloader/files/15255833)
Supplement: Supplementary file 1 [file 15255833]

## Sheet: Tabelle1
no	ID	sex	remarks	A1 [µm]	A2 [µm]	T1 [µm]	T2 [µm]	A1EIV/EIII	A1EV/EIII	A2EIII/EIIIGM	A2EIV/EIII	A2EIV/EII	T1EIII/EII	T2EIII/EII	A1/A2	T1/T2	A1/T1	A2/T2	A1/T2	n eggs	n larvae
#23	BR EM 3 15 #23	female		160.52	253.99	173.8	243.07	1.96996	1.15122	0.543682	0.267385	0.900062	0.690483	0.517081	0.631993	0.71502	0.92359	1.04493	0.660386	3	n.o.
#1	BR ITA 4 15 #1	female		180.1	276.69	197.1	266.65	1.86898	1.13058	0.557941	0.276774	0.851621	0.606639	0.50473	0.650909	0.739171	0.913749	1.03765	0.675417	3	0
#12	BR ITA 4 15 #12	female		158.05	243.12	175.39	246.63	1.94936	1.11362	0.513073	0.280686	0.941202	0.816257	0.575811	0.65009	0.711146	0.901135	0.985768	0.640839	0	0
#13	BR ITA 4 15 #13	female		176.08	271.39	173.69	249.46	1.82866	1.08945	0.571816	0.258543	0.811565	0.73772	0.604422	0.648808	0.696264	1.01376	1.08791	0.705845	11	0
#2	BR ITA 4 15 #2	female		164.78	257.35	178.64	261.48	1.96874	1.18503	0.514656	0.273642	0.926125	0.691079	0.502933	0.640295	0.683188	0.922414	0.984205	0.630182	9	0
#3	BR ITA 4 15 #3	female		168.3	249.47	175.41	249.82	2.05095	1.19369	0.527973	0.268606	0.94232	0.662275	0.566429	0.67463	0.702146	0.959466	0.998599	0.673685	0	0
#4	BR ITA 4 15 #4	female		159.1	244.27	170.56	247.65	2.02069	1.14533	0.496586	0.263932	0.904409	0.726095	0.543928	0.651328	0.688714	0.93281	0.986352	0.642439	0	0
#5	BR ITA 4 15 #5	female		175.08	261.37	180.64	262.05	1.83232	1.09764	0.530874	0.257994	0.890638	0.682557	0.606155	0.669855	0.689334	0.969221	0.997405	0.668117	10	0
#6	BR ITA 4 15 #6	female		174.53	266.03	181.53	258.44	1.87158	1.13784	0.530969	0.261414	0.866407	0.67966	0.611752	0.656054	0.702407	0.961439	1.02937	0.675321	15	0
#7	BR ITA 4 15 #7	female		184.65	265.11	191.96	276.45	1.67839	1.03317	0.431217	0.242433	0.921433	0.737215	0.555591	0.696503	0.694375	0.961919	0.95898	0.667933	7	1
#8	BR ITA 4 15 #8	female		174.01	250.69	188.55	258.48	1.82609	1.13499	0.523083	0.268154	0.812283	0.791132	0.610418	0.694124	0.729457	0.922885	0.969862	0.673205	0	0
#14	BR PTO 4 15 #14	female		175.62	266.05	176.72	262.33	1.68722	1.0855	0.539772	0.27649	0.859731	0.70376	0.515822	0.660101	0.673655	0.993775	1.01418	0.669462	5	0
#15	BR PTO 4 15 #15	female		173.18	260.68	177.6	254.56	1.85772	1.03484	0.5266	0.30852	1.04978	0.716011	0.554759	0.664339	0.697674	0.975113	1.02404	0.680311	20	0
#16	BR PTO 4 15 #16	female		179.51	268.42	188.38	269.95	1.93367	1.14425	0.538222	0.272902	0.933573	0.628179	0.536144	0.668765	0.697833	0.952914	0.994332	0.664975	2	0
#17	BR PTO 4 15 #17	female		179.43	263.6	179.55	260.92	1.87116	1.1215	0.537128	0.272368	0.889323	0.663406	0.582301	0.68069	0.688142	0.999332	1.01027	0.687682	2	0
#35	BR PTO 4 15 #35	female		170.6	264.23	176.41	256.68	1.88663	1.0128	0.490259	0.281654	1.00761	0.710496	0.552573	0.64565	0.687276	0.967065	1.02941	0.664641	7	n.o.
#96	BR RMA 3 15 #96	female		171.68	272.31	185.92	266.6	1.86292	0.995056	0.573267	0.255901	0.800688	0.683504	0.57614	0.630458	0.697374	0.923408	1.02142	0.643961	23	0
#97	BR RMA 3 15 #97	female		177.74	270.68	191.4	258.71	2.01013	1.08337	0.539337	0.260974	0.918626	0.719512	0.525656	0.656643	0.739825	0.928631	1.04627	0.687024	30	0
#33	BR-PTO4 15 #33	female		167.98	261.38	196.41	238.97	1.60095	0.870428	0.551116	0.258262	0.834658	0.711938	0.576905	0.642666	0.821902	0.855252	1.09378	0.702933	n.o.	n.o.
#34	BR-PTO4 15 #34	female		173.88	264.04	187.05	264.6	1.80818	0.973467	0.568132	0.273528	0.887464	0.64767	0.572554	0.658537	0.706916	0.929591	0.997884	0.657143	1	0
#21	CO ET 1a 15 #21	female		179.42	277.54	184.95	279.64	1.78476	1.10048	0.537763	0.239593	0.835955	0.746555	0.502733	0.646465	0.661386	0.9701	0.99249	0.641611	28	n.o.
#22	CO ET 1a 15 #22	female		169.46	265.98	181.21	257.62	2.00495	1.18546	0.582833	0.26577	0.875073	1.05774	0.526534	0.637116	0.7034	0.935158	1.03245	0.657791	28	n.o.
#92	CO ET 1a 15 #92	female		181.07	275.22	173.62	274.83	1.98501	1.19193	0.538848	0.268444	0.995028	0.701662	0.543123	0.65791	0.631736	1.04291	1.00142	0.658844	26	5
#93	CO ET 1a 15 #93	female		174.32	261.77	180.83	245.62	2.1415	1.2165	0.438573	0.268176	1.10152	0.527503	0.559602	0.665928	0.736219	0.963999	1.06575	0.709714	6	0
#75	FL EG 3 14 #75	female		161.78	249.42	181.64	251.58	1.93434	1.08903	0.579254	0.229204	0.82922	0.673554	0.559735	0.648625	0.721997	0.890663	0.991414	0.643056	5	3
#78	FL EG 3 14 #78	female		178.99	277.57	185.75	269.05	2.01543	1.10781	0.565353	0.245923	0.884304	0.802185	0.567333	0.644846	0.690392	0.963607	1.03167	0.665267	13	6
#79	FL PR 1 14 #79	female		173.02	276.08	187.13	260.47	1.87334	1.14757	0.523455	0.232364	0.901382	0.738785	0.618695	0.626702	0.718432	0.924598	1.05993	0.664261	0	0
#80	FL PR 1 14 #80	female		176.53	276.33	175.85	270.25	1.70373	0.890857	0.493462	0.247884	1.0236	0.845465	0.631899	0.638838	0.650694	1.00387	1.0225	0.65321	0	0
#81	FL PR 1 14 #81	female		182.3	295.52	184.94	272.94	2.09308	1.12781	0.541751	0.253191	0.967293	0.814445	0.601194	0.616879	0.677585	0.985725	1.08273	0.667912	17	5
#101	FL LX 4 14 #101	female		173.18	260.68	177.6	254.56	1.85772	1.03484	0.5266	0.30852	1.04978	0.716011	0.554759	0.664339	0.697674	0.975113	1.02404	0.680311	4	3
#102	FL LX 4 14 #102	female		179.51	268.42	188.38	269.95	1.93367	1.14425	0.538222	0.272902	0.933573	0.628179	0.536144	0.668765	0.697833	0.952914	0.994332	0.664975	8	2
#103	FL LX 4 14 #103	female		179.43	263.6	179.55	260.92	1.87116	1.1215	0.537128	0.272368	0.889323	0.663406	0.582301	0.68069	0.688142	0.999332	1.01027	0.687682	15	0
#104	FL LX 4 14 #104	female		150.54	242.52	161.66	242.13	2.01522	1.1514	0.567331	0.264435	0.8913	0.720812	0.591827	0.620732	0.667658	0.931214	1.00161	0.621732	11	7
#105	FL LX 4 14 #105	female		162.39	258.44	176.59	256.21	2.11993	1.13223	0.606054	0.27432	0.857501	0.796623	0.544102	0.628347	0.689239	0.919588	1.0087	0.633816	10	0
#42	FL Cal 14 3 #42	female		158.18	265.98	173.93	227.5	1.75733	0.951465	0.700768	0.255214	0.85499	0.663905	0.666737	0.594706	0.764527	0.909446	1.16914	0.695297	7	3
#43	FL Cal 14 3 #43	female		154.64	286.33	175.96	260.8	2.24763	1.33837	0.977112	0.252692	0.751072	0.89294	0.67017	0.540076	0.674693	0.878836	1.09789	0.592945	7	3
#106	MX LG 1 14 #106	female		161.66	238.14	162.93	246.42	1.95169	1.13682	0.568555	0.267641	0.914689	0.704656	0.511727	0.678844	0.661188	0.992205	0.966399	0.656034	10	2
#107	MX LG 1 14 #107	female		161.48	255.68	174.51	251.68	1.57752	0.973829	0.630412	0.25799	0.899515	0.62854	0.542311	0.631571	0.69338	0.925334	1.01589	0.641608	3	0
#108	MX Pul 1 14 #108	female		149.62	235.07	164.17	236.42	2.09763	1.22415	0.541213	0.267572	0.923622	0.744928	0.521358	0.636491	0.6944	0.911372	0.99429	0.632857	3	1
#109	MX Pul 1 14 #109	female		121.41	193.17	136.01	186.46	1.67706	1.10754	0.52455	0.278672	0.927619	0.763945	0.647792	0.628514	0.729433	0.892655	1.03599	0.651132	3	0
#110	MX Pul 1 14 #110	female		155.27	256.72	168.57	248.17	1.55866	0.971805	0.718822	0.25811	0.682853	0.684345	0.533922	0.604822	0.679252	0.921101	1.03445	0.62566	7	3
#111	MX Pul 1 14 #111	female		131.68	195.89	137.9	190.48	1.73312	1.1501	0.506609	0.279951	0.921991	0.671694	0.512299	0.672214	0.723961	0.954895	1.0284	0.691306	1	1
#112	MX Pul 1 14 #112	female		131.95	207.63	141.26	198.04	1.78457	1.07249	0.553833	0.263407	0.883006	0.783075	0.599563	0.635505	0.71329	0.934093	1.04842	0.66628	3	7
#37	MX CA1 14 #37	female		135.39	236.83	158.46	227.5	1.92566	1.16591	0.59193	0.247538	0.730093	0.765581	0.709346	0.571676	0.696527	0.854411	1.04101	0.595121	4	4
#40	MX CA1 14 #40	female		139.02	241.75	164.75	223.96	1.70602	1.03308	0.656576	0.257467	0.719246	0.516837	0.687733	0.575057	0.735622	0.843824	1.07943	0.620736	7	1
#50	MX Pul 14 #50	female		151.56	246.7	161.2	234.01	1.9409	1.04019	0.638352	0.222623	0.712749	0.758672	0.54117	0.614349	0.688859	0.940199	1.05423	0.647665	14	0
#47	MX Pul 14 #47	female		148.21	247.01	165.32	233.82	2.28879	1.27432	0.64	0.207163	0.761056	0.689368	0.585596	0.600016	0.70704	0.896504	1.05641	0.633864	0	0
#66	MX Sil 14 #66	female		142.89	235.11	150.43	231.02	2.03285	1.1587	0.56096	0.247729	0.858275	0.698123	0.59306	0.607758	0.651156	0.949877	1.0177	0.618518	0	0
BB01_09	#13	female 1		195.25	316.51	235.26	337.87	1.77651	1.26008	0.569652	0.241609	0.615172	0.752996	0.610222	0.616884	0.696303	0.829933	0.93678	0.577885
LC02_09	#18	female 1		203.34	317.05	231.37	333.79	1.65977	1.27331	0.666165	0.281981	0.707032	0.555321	0.486528	0.64135	0.69316	0.878852	0.949849	0.609185
LC01_09	#33	female 1		182.68	300.96	226.37	330.15	2.22508	1.47953	0.507981	0.291824	0.875283	0.635171	0.493971	0.606991	0.685658	0.806997	0.911586	0.553324
LC02_09	#35	female 1		202.47	327.08	235.6	338.14	1.87936	1.20516	0.648271	0.282974	0.693311	0.625281	0.476242	0.619023	0.696753	0.85938	0.967292	0.598776
BB01_09	#1	female 2		173.53	277.98	291.75	294.66	1.68082	1.09732	0.735795	0.240575	0.63861	0.472248	0.571087	0.624254	0.990124	0.59479	0.943392	0.588916
LC02_09	#19	female 2		170.04	276.4	201.55	294.02	1.96347	1.0967	0.71534	0.204468	0.563614	0.578568	0.470951	0.615195	0.685498	0.843662	0.940072	0.578328
BB01_09	#21	female 2		172.78	265.37	204.04	294.99	1.75683	1.05225	0.569453	0.222164	0.667195	0.63824	0.496266	0.651091	0.691684	0.846795	0.89959	0.585715
BB02_09	#24	female 2		176.25	278.63	205.49	293.12	1.80153	1.05514	0.671064	0.242655	0.681437	0.715531	0.602542	0.632559	0.701044	0.857706	0.950566	0.60129
LC01_09	#25	female 2		172.61	279.94	201.22	291.69	1.89827	1.13845	0.649989	0.241003	0.723498	0.589952	0.498121	0.616596	0.689842	0.857817	0.959718	0.591758
LC01_09	#26	female 2		168.18	267.08	193.59	278.58	1.90492	1.17415	0.627004	0.263831	0.795103	0.53067	0.525863	0.629699	0.694917	0.868743	0.958719	0.603705
LC01_09	#27	female 2		165.95	265.94	204.89	293.96	1.88838	1.08647	0.52006	0.244196	0.737963	0.540844	0.5563	0.624013	0.697	0.809947	0.904681	0.564533
BB01_09	#5	female 2		181.29	288.57	202.41	295.75	1.90827	1.1088	0.641339	0.244818	0.690372	0.794527	0.565004	0.628236	0.684396	0.895657	0.975723	0.612984
BB02_09	#2	male		151.15	258.37	185.84	257.87	2.03604	1.12215	0.942684	0.259108	0.670292	0.623803	0.563286	0.585014	0.720673	0.813334	1.00194	0.586148
LC01_09	#30	male		158.76	256.02	183.97	266.49	2.15542	1.34714	0.69159	0.276712	0.755563	0.647133	0.502755	0.620108	0.690345	0.862967	0.960711	0.595745
LC01_09	#31	male		155.37	236.44	190.22	278	1.75535	1.06867	0.505303	0.261097	0.987796	0.572774	0.502495	0.657122	0.684245	0.816791	0.850504	0.558885
BB02_09	#36	male		155.85	249.34	198.52	281.25	2.02177	1.2202	0.605551	0.236334	0.834517	0.577187	0.463111	0.62505	0.705849	0.785059	0.886542	0.554133
BB02_09	#37	male		144.5	234.75	180.32	272.77	1.86225	1.14274	0.612462	0.225849	0.701126	0.557643	0.509908	0.615548	0.66107	0.801353	0.860615	0.52975
BB02_09	#38	male		152.87	245.54	181.32	246.58	2.05648	1.13518	0.613479	0.258925	0.793943	0.674831	0.582201	0.622587	0.735339	0.843095	0.995782	0.619961
BB01_09	#39	male		162.06	214.43	182.52	267	2.24486	1.31635	0.5843	0.246046	0.626947	0.660046	0.508023	0.755771	0.683596	0.887903	0.803109	0.606966
BB01_09	#40	male		159.48	257.13	189.56	269.79	2.08435	1.25524	0.636121	0.213369	0.647605	0.629805	0.500347	0.620231	0.702621	0.841317	0.953075	0.591126
BB02_09	#43	male		154.91	241.57	179.2	268.44	1.99519	1.14347	0.591751	0.26722	0.792085	0.606284	0.494911	0.641263	0.667561	0.864453	0.899903	0.577075
BB02_09	#45	male		156.18	241.66	178.62	258.45	1.69914	1.1335	0.620881	0.245816	0.70972	0.69504	0.483917	0.64628	0.69112	0.87437	0.935036	0.604295
#10	BR ITA 4 15 #10	male		161.04	250.8	165.36	249.16	1.93684	1.1155	0.554586	0.266243	0.941883	0.692354	0.5442	0.642105	0.66367	0.973875	1.00658	0.646332
#11	BR ITA 4 15 #11	male		167.03	255.45	178.46	248.28	1.77298	1.02662	0.49945	0.252728	0.933892	0.822506	0.544612	0.653866	0.718785	0.935952	1.02888	0.672749
#24	BR ITA 4 15 #24	male		161.66	238.14	162.93	246.42	1.95169	1.13682	0.568555	0.267641	0.914689	0.704656	0.511727	0.678844	0.661188	0.992205	0.966399	0.656034
#26	BR ITA 4 15 #26	male		149.62	235.07	164.17	236.42	2.09763	1.22415	0.541213	0.267572	0.923622	0.744928	0.521358	0.636491	0.6944	0.911372	0.99429	0.632857
#28	BR ITA 4 15 #28	male		155.27	256.72	168.57	248.17	1.55866	0.971805	0.718822	0.25811	0.682853	0.684345	0.533922	0.604822	0.679252	0.921101	1.03445	0.62566
#9	BR ITA 4 15 #9	male		154.49	249.17	174.07	252.82	1.99866	1.14094	0.532198	0.261009	0.857939	0.842607	0.582937	0.620018	0.688514	0.887517	0.985563	0.611067
#18	BR PTO 4 15 #18	male		150.54	242.52	161.66	242.13	2.01522	1.1514	0.567331	0.264435	0.8913	0.720812	0.591827	0.620732	0.667658	0.931214	1.00161	0.621732
#19	BR PTO 4 15 #19	male		162.39	258.44	176.59	256.21	2.11993	1.13223	0.606054	0.27432	0.857501	0.796623	0.544102	0.628347	0.689239	0.919588	1.0087	0.633816
#20	BR PTO 4 15 #20	male		164.4	238.02	172.26	238.97	1.86186	1.07398	0.516983	0.285799	0.993108	0.633448	0.588969	0.690698	0.720844	0.954371	0.996025	0.687952
#98	BR RMA 3 15 #98	male		154.66	248.3	201.17	238.91	1.76186	0.981123	0.712348	0.279339	0.755524	0.642255	0.626235	0.622876	0.842033	0.768803	1.0393	0.647357
#18	BR-PTO4 15 #18	male		149.94	243.18	161.87	243.59	1.90882	1.08851	0.64301	0.253195	0.70933	0.657491	0.606161	0.61658	0.664518	0.926299	0.998317	0.615543
#36	BR-PTO4 15 #36	male		149.84	242.67	161.83	242.82	2.07004	1.16154	0.545946	0.268027	0.869181	0.727739	0.576969	0.617464	0.666461	0.92591	0.999382	0.617083
#44	FL Cal 14 3 #44	male		152.18	244.98	151.68	221.37	1.79496	1.001	0.550756	0.216233	0.818203	0.830792	0.700837	0.621194	0.685188	1.0033	1.10665	0.687446
#45	FL Cal 14 3 #45	male		148.35	250.67	163.32	233.83	2.0307	1.03591	0.609482	0.220594	0.758971	0.942531	0.707694	0.591814	0.698456	0.908339	1.07202	0.634435
#76	FL EG 3 14 #76	male		140.11	218.17	155.13	218.59	2.03771	0.965429	0.566074	0.252501	0.958586	0.59189	0.59535	0.642206	0.709685	0.903178	0.998079	0.640972
#77	FL EG 3 14 #77	male		140.1	228.8	151.41	228.56	1.72132	0.989934	0.656774	0.226325	0.841351	0.787144	0.5895	0.612325	0.662452	0.925302	1.00105	0.612968
#67	FL EG 4 14 #67	male		144.32	239.11	151.22	227.95	1.79504	1.01187	0.75605	0.261731	0.851046	0.893385	0.54708	0.603572	0.663391	0.954371	1.04896	0.633121
#74	FL EG 4 14 #74	male		144.53	228.72	162.42	228.69	1.82415	1.06211	0.692479	0.239654	0.755742	0.876401	0.548203	0.631908	0.710219	0.889853	1.00013	0.631991
#87	FL LX 4 14 #87	male		154.52	242.53	159.59	233.44	1.95088	1.10796	0.606562	0.239825	0.805579	0.874871	0.680121	0.637117	0.683645	0.968231	1.03894	0.661926
#82	FL PR 1 14 #82	male		173	274.17	181.76	257.41	1.80215	1.00088	0.600599	0.261361	0.882771	0.709996	0.49563	0.630995	0.706111	0.951805	1.06511	0.67208
#39	MX CA1 14 #39	male		128.63	222.94	151.45	209.07	1.51743	0.906308	0.723401	0.246708	0.707077	0.717916	0.557311	0.576971	0.724399	0.849323	1.06634	0.615248
#41	MX CA1 14 #41	male		121.69	220.23	149.05	222.01	1.56564	1.00822	0.695452	0.220172	0.64197	0.691809	0.533912	0.552559	0.671366	0.816437	0.991982	0.548128
#55	MX CT 14 #55	male		128.7	218.06	154.67	215.11	1.8085	1.21212	0.568359	0.225096	0.762996	0.875362	0.683015	0.590205	0.719027	0.832094	1.01371	0.598299
#49	MX Pul 14 #49	male		124.27	218.57	141.43	200.26	1.82933	0.904748	0.767799	0.23836	0.702254	0.782601	0.626332	0.568559	0.706232	0.878668	1.09143	0.620543
#62	MX Sil 14 #62	male		137.61	212.18	161.62	226.74	1.86369	1.12732	0.657581	0.247299	0.792511	0.758549	0.601565	0.648553	0.712799	0.851442	0.935785	0.606907
#64	MX Sil 14 #64	male		143.17	232.85	149.4	224.15	1.94342	1.10665	0.575007	0.238727	0.863904	0.798666	0.631212	0.614859	0.666518	0.9583	1.03881	0.638724
#30	BR ITA 4 15 #30	A-1		131.95	207.63	141.26	198.04	1.78457	1.07249	0.553833	0.263407	0.883006	0.783075	0.599563	0.635505	0.71329	0.934093	1.04842	0.66628
#94	CO ET 1a 15 #94	A-1		126.6	192.03	128.88	182.63	1.61939	1.16876	0.516036	0.273138	0.993257	0.782609	0.523582	0.659272	0.705689	0.982309	1.05147	0.693205
#56	MX CT 14 #56	A-1		119.77	205.22	144.77	181.03	1.51118	1.01354	0.538929	0.271948	0.910092	0.78481	0.70127	0.583618	0.799702	0.827312	1.13362	0.661603
#58	MX CT 14 #58	A-1	proto-female	120.28	204.13	143.33	194.08	1.69818	1.1434	0.486281	0.255171	0.875715	0.657727	0.550361	0.589232	0.73851	0.839182	1.05178	0.619744
#91	MX SiNo 14 #91	A-1		118.78	206.05	139.78	180.76	1.5914	1.08259	0.548054	0.281746	0.998386	0.638676	0.656014	0.576462	0.773291	0.849764	1.13991	0.657114
#52	MX Pul 14 #52	A-1		128.78	196.46	127.22	180.3	1.61466	1.0449	0.610973	0.250686	0.867878	0.653762	0.661716	0.655502	0.705602	1.01226	1.08963	0.714254
#51	MX Pul 14 #51	A-1		126.85	192.12	149.29	190.62	1.76523	1.09744	0.544456	0.238731	0.858847	0.580376	0.537625	0.660264	0.783181	0.849689	1.00787	0.66546
#99	BR EM 3 15 #99	A-1	proto female	130.15	201.25	187.16	191.57	1.86613	1.16703	0.569938	0.266693	0.809971	0.569243	0.56213	0.646708	0.97698	0.695394	1.05053	0.679386
#68	FL EG 4 14 #68	A-1		122.48	211.87	141.22	187.31	1.81079	1.05172	0.57541	0.244571	0.816744	0.656357	0.604294	0.57809	0.753937	0.867299	1.13112	0.653889
#90	MX SiNo 14 #90	A-1	proto-female	119.53	205.24	185.94	144.87	1.74089	1.01319	0.543174	0.279177	0.924726	0.612085	0.761938	0.582391	1.2835	0.642842	1.41672	0.825085
#29	BR ITA 4 15 #29	A-1		131.68	195.89	137.9	190.48	1.73312	1.1501	0.506609	0.279951	0.921991	0.671694	0.512299	0.672214	0.723961	0.954895	1.0284	0.691306
#31	BR ITA 4 15 #31	A-1		140.88	216.36	150.2	198.53	1.68641	1.15857	0.528499	0.314657	0.921749	0.616752	0.505788	0.651137	0.756561	0.937949	1.08981	0.709616
#32	BR ITA 4 15 #32	A-1		132	213.66	143.8	196.85	1.87964	1.07246	0.58856	0.25241	0.7605	0.756383	0.62966	0.617804	0.730505	0.917942	1.08539	0.670561
#100	BR EM 3 15 #100	A-1		133.96	202	137.7	199.11	1.7357	1.09611	0.473319	0.292789	0.951094	0.714412	0.622539	0.663168	0.691578	0.97284	1.01451	0.672794
#27	BR ITA 4 15 #27	A-1		121.41	193.17	136.01	186.46	1.67706	1.10754	0.52455	0.278672	0.927619	0.763945	0.647792	0.628514	0.729433	0.892655	1.03599	0.651132
#88	FL LX 4 14 #88	A-1	proto-male	121.85	185.61	134.96	185.37	1.74821	1.21053	0.481362	0.257695	0.954573	0.723352	0.605854	0.656484	0.728057	0.90286	1.00129	0.657334
#83	FL PR 1 14 #83	A-1	valves adult male	165.49	261.88	181.31	257.56	1.91649	1.06643	0.597989	0.220097	0.800125	0.67308	0.569442	0.631931	0.703952	0.912746	1.01677	0.64253
#85	FL PR 1 14 #85	A-1	valves adult male	159.57	261.41	169.64	256.72	1.62442	0.911367	0.586779	0.248336	0.850999	0.602852	0.631695	0.61042	0.660798	0.940639	1.01827	0.621572
LC01_09	#15	A-1		128.76	235	169.22	224.52	1.89848	1.27798	0.862662	0.287465	0.612908	0.728095	0.505727	0.547915	0.753697	0.760903	1.04668	0.57349
LC02_09	#16	A-1		132.89	217.55	167.37	223.72	1.70757	1.14766	0.655009	0.248189	0.721336	0.736812	0.545213	0.610848	0.748123	0.793989	0.972421	0.594001
BB01_09	#23	A-1		129.29	212.55	163.98	224.27	1.76572	1.16287	0.716579	0.219816	0.540851	0.708309	0.487282	0.60828	0.731172	0.78845	0.947742	0.576493
LC01_09	#28	A-1		132.99	205.13	152.2	205.52	1.65916	1.17893	0.706484	0.277304	0.744548	0.530139	0.489662	0.648321	0.740561	0.873784	0.998102	0.64709
LC01_09	#32	A-1		122.18	193.85	148.45	197.17	1.85943	1.21053	0.645664	0.243073	0.702274	0.49051	0.487971	0.630281	0.752904	0.823038	0.983162	0.619668
LC01_09	#34	A-1		134.49	210.95	162.66	225.57	1.79152	1.25451	0.56182	0.270855	0.861171	0.693521	0.463226	0.637544	0.721107	0.826817	0.935186	0.596223
BB01_09	#41	A-1		136.74	217.52	165.15	226.83	1.82539	1.24911	0.613651	0.263127	0.73727	0.529558	0.467982	0.628632	0.728078	0.827975	0.958956	0.60283
BB02_09	#44	A-1		133.81	212.47	163.98	229.4	1.68997	0.97807	0.591133	0.195377	0.618694	0.478121	0.455161	0.629783	0.714821	0.816014	0.926199	0.583304
#57	MX CT 14 #57	A-1	proto-female	112.99	192.47	133.08	132.37	2.06288	1.24314	0.515523	0.247358	0.809826	0.889591	0.840033	0.587053	1.00536	0.849038	1.45403	0.853592
#59	MX CT 14 #59	A-1	proto-female	138.15	224.79	151.15	226.12	1.84887	0.926756	0.576221	0.233764	0.810329	1.18446	0.670518	0.614574	0.66845	0.913993	0.994118	0.610959
#60	MX Sil 14 #60	A-1	prot-female	114	184.99	131.74	172.59	1.9852	1.12883	0.559339	0.263913	0.943897	0.840614	0.66354	0.61625	0.763312	0.865341	1.07185	0.660525
#65	MX Sil 14 #65	A-1		122.63	178.28	134.82	179.84	1.9058	1.16153	0.72374	0.261638	0.775385	0.711123	0.588699	0.687851	0.749666	0.909583	0.991326	0.681884
#61	MX Sil 14 #61	A-1	proto-male	115.39	186.92	128.22	165.03	2.05106	1.15718	0.578047	0.26235	0.837009	0.850505	0.70112	0.617323	0.77695	0.899938	1.13264	0.699206
BB01_09	#42	A-2		124.41	187.9	154.5	198.48	1.81977	1.21297	0.512118	0.202314	0.681904	0.609697	0.459186	0.662108	0.778416	0.805243	0.946695	0.626814
#69	FL EG 4 14 #69	A-2		102.08	161.68	105.83	137.98	1.58268	1.03974	0.527977	0.260389	0.927989	0.746932	0.577247	0.631371	0.766995	0.964566	1.17176	0.739817
BB01_09	#11	A-2		122.55	194.8	154.7	202.51	1.6837	1.18102	0.589326	0.279446	0.787657	0.787504	0.55024	0.629107	0.763913	0.792178	0.961928	0.605155
#71	FL EG 4 14 #71	A-2		104.05	162.25	109.1	135.82	1.44837	0.984494	0.609369	0.274736	0.881707	0.651158	0.569221	0.641294	0.803269	0.953712	1.1946	0.766087
#72	FL EG 4 14 #72	A-2		107.32	170.1	112.79	139.44	1.70519	1.22019	0.59331	0.267633	0.827118	0.664733	0.485952	0.630923	0.808878	0.951503	1.21988	0.76965
#63	MX Sil 14 #63	A-2		92.5	151.77	104.27	131.97	1.82754	1.29456	0.602562	0.300601	0.915958	0.738	0.57684	0.609475	0.790104	0.88712	1.15003	0.700917
BB01_09	#9	A-3		101.81	169.88	130.77	166.39	1.59481	1.02704	0.698216	0.259372	0.735073	0.95467	0.669974	0.599305	0.785925	0.778542	1.02097	0.611876
Number of specimens				134
Number of females				60
Number of males				36
Number of A-1 instars				31
Number of A-2 instars				6
Number of A-3 instars				1
